# Supplementary material for: Maximizing Heterologous Expression of Engineered Type I Polyketide Synthases: Investigating Codon Optimization Strategies
Source: PubMed Central journal article supplement — ACS Synth Biol. 2023 Oct 18;12(11):3366–80. doi: 10.1021/acssynbio.3c00367 (PMC10661030; doi:10.1021/acssynbio.3c00367), 2023-10-18
Supplement: sb3c00367_si_001.pdf [file sb3c00367_si_001.pdf]

# Supplementary Information

## Maximizing Heterologous Expression of Engineered Type I Polyketide Synthases: Investigating Codon Optimization Strategies

Matthias Schmidt<sup>1,2,3,4</sup>, Namil Lee<sup>1,2,4#</sup>, Chunjun Zhan<sup>1,2,#</sup>, Jacob B. Roberts<sup>1,2,5</sup>, Alberto A. Nava<sup>1,2,8</sup>, Leah S. Keiser<sup>1,2,8</sup>, Aaron A. Vilchez<sup>1,2,8</sup>, Yan Chen<sup>1,2</sup>, Christopher J. Petzold<sup>1,2</sup>, Robert W. Haushalter<sup>1,2</sup>, Lars M. Blank<sup>3</sup>, Jay D. Keasling<sup>1,2,5,6,7,8,9,10,\*</sup>

<sup>1</sup>Joint BioEnergy Institute, 5885 Hollis Street, Emeryville, California 94608, United States.

<sup>2</sup>Biological Systems & Engineering Division, Lawrence Berkeley National Laboratory, Berkeley, California 94720, United States.

<sup>3</sup>Institute of Applied Microbiology (iAMB), Aachen Biology and Biotechnology (ABBt), RWTH Aachen University, 52062 Aachen, Germany.

<sup>4</sup>California Institute for Quantitative Biosciences (QB3), University of California, Berkeley, California 94720, United States.

<sup>5</sup>Joint Program in Bioengineering, University of California, Berkeley, California 94720, United States.

<sup>6</sup>Department of Chemistry, University of California, Berkeley, California 94720, United States.

<sup>7</sup>Environmental Genomics and Systems Biology Division, Lawrence Berkeley National Laboratory, Berkeley, California 94720, United States.

<sup>8</sup>Department of Chemical and Biomolecular Engineering, University of California, Berkeley, California 94720, United States.

<sup>9</sup>The Novo Nordisk Foundation Center for Biosustainability, Technical University of Denmark, 2800 Kgs. Lyngby, Denmark.

<sup>10</sup>Center for Synthetic Biochemistry, Institute for Synthetic Biology, Shenzhen Institutes for Advanced Technologies, Shenzhen 518071, China.

#Authors contributed equally.

\*Corresponding author: Jay D. Keasling, [jdkeasling@lbl.gov](mailto:jdkeasling@lbl.gov)

**Table S1:** List of all applied constraints during codon optimization.

| <b>Codon optimization constraints</b>                |
|------------------------------------------------------|
| UniquifyAllKmers(9, include_reverse_complement=True) |
| AvoidHairpins(stem_size=10, hairpin_window=100)      |
| AvoidPattern("9xA")                                  |
| AvoidPattern("9xT")                                  |
| AvoidPattern("6xC")                                  |
| AvoidPattern("6xG")                                  |
| AvoidPattern("NdeI_site")                            |
| AvoidPattern("XhoI_site")                            |
| AvoidPattern("SpeI_site")                            |
| AvoidPattern("BamHI_site")                           |
| AvoidPattern("BsaI_site")                            |
| EnforceGCContent(mini=0.3, maxi=0.75, window=50)     |
| EnforceTranslation()                                 |

**Table S2:** Primers used in this study.

| Primer                                                                         | Sequence                   | Description                                                  |
|--------------------------------------------------------------------------------|----------------------------|--------------------------------------------------------------|
| <b>Confirmation primers for serine recombinase-assisted genome engineering</b> |                            |                                                              |
| cPCR-AG5577_BxB1_F                                                             | AGCAAATTCGGCAACAC<br>GC    | Confirmation of BxB1 integrations into AG5577 BxB1 attB site |
| cPCR-AG5577_BxB1_R                                                             | CTAGGCAGAATTTGGG<br>AGTGCC | Confirmation of BxB1 integrations into AG5577 BxB1 attB site |

|                       |                                   |                                                                                                    |
|-----------------------|-----------------------------------|----------------------------------------------------------------------------------------------------|
| cPCR-AG5577_MR11_F    | GTGATTTGAAAGAGTTGT<br>CAGTTAGCTCG | Confirmation of MR11 integrations into AG5577 MR11 attB site                                       |
| cPCR-AG5577_MR11_R    | AGGACTCACCTCTAGAA<br>CACGC        | Confirmation of MR11 integrations into AG5577 MR11 attB site                                       |
| cPCR-AG6212_BxB1_F    | CGAATTCTTTTCATTTAAG<br>ACCCTAATA  | Confirmation of BxB1 integrations into AG6212 BxB1 attB site                                       |
| cPCR-AG6212_BxB1_R    | CTAGGCAGAATTTTGGG<br>AGTGG        | Confirmation of BxB1 integrations into AG6212 BxB1 attB site                                       |
| cPCR-LipPKS-Cg_abc_F  | CGCCATGGAACTGCGTAA                | Anneals to 3' end of codon optimized LipPKS gene. Confirmation of integration into the host genome |
| cPCR-LipPKS-Cg_abc_R  | GGTATGGTGCAAAGGCAT<br>CT          | Anneals to 5' end of codon optimized LipPKS gene. Confirmation of integration into the host genome |
| cPCR-LipPKS-Cg_mcu_F  | CGCCATGGAAATTGCGAAA<br>C          | Anneals to 3' end of codon optimized LipPKS gene. Confirmation of integration into the host genome |
| cPCR-LipPKS-Cg_mcu_R  | AAAGACTGTGGCCCAAGT<br>AG          | Anneals to 5' end of codon optimized LipPKS gene. Confirmation of integration into the host genome |
| cPCR-LipPKS-Cg_hrca_F | AGAGCTGGACTCTGGAAC<br>T           | Anneals to 3' end of codon optimized LipPKS gene. Confirmation of integration into the host genome |

|                       |                         |                                                                                                    |
|-----------------------|-------------------------|----------------------------------------------------------------------------------------------------|
| cPCR-LipPKS-Cg_hrca_R | GCGTTCCAAAGGTCGGTT<br>A | Anneals to 5' end of codon optimized LipPKS gene. Confirmation of integration into the host genome |
| cPCR-LipPKS-Pp_abc_F  | CGCCATGGAACTGCGTAA      | Anneals to 3' end of codon optimized LipPKS gene. Confirmation of integration into the host genome |
| cPCR-LipPKS-Pp_abc_R  | GTCACGCTATCCAGCAGA<br>C | Anneals to 5' end of codon optimized LipPKS gene. Confirmation of integration into the host genome |
| cPCR-LipPKS-Pp_mcu_F  | GCCATGGAACTGCGAAAC      | Anneals to 3' end of codon optimized LipPKS gene. Confirmation of integration into the host genome |
| cPCR-LipPKS-Pp_mcu_R  | GTCACGGAATCCAGCAGA<br>C | Anneals to 5' end of codon optimized LipPKS gene. Confirmation of integration into the host genome |
| cPCR-LipPKS-Pp_hrca_F | CTTGACCGCCATGGAACT      | Anneals to 3' end of codon optimized LipPKS gene. Confirmation of integration into the host genome |
| cPCR-LipPKS-Pp_hrca_R | TCACGCTATCCAGCAGAG<br>A | Anneals to 5' end of codon optimized LipPKS gene. Confirmation of integration into the host genome |
| cPCR-LipPKS-Ec_abc_F  | GCGACGTTGGCTTTGATA<br>G | Anneals to 3' end of codon optimized LipPKS gene. Confirmation of integration into the host genome |

|                       |                         |                                                                                                    |
|-----------------------|-------------------------|----------------------------------------------------------------------------------------------------|
| cPCR-LipPKS-Ec_abc_R  | CAAATAACGCTGGCTGCA<br>C | Anneals to 5' end of codon optimized LipPKS gene. Confirmation of integration into the host genome |
| cPCR-LipPKS-Ec_mcu_F  | CGCCATGGAACTGCGTAA      | Anneals to 3' end of codon optimized LipPKS gene. Confirmation of integration into the host genome |
| cPCR-LipPKS-Ec_mcu_R  | CACGGAATCCAGCAGACT      | Anneals to 5' end of codon optimized LipPKS gene. Confirmation of integration into the host genome |
| cPCR-LipPKS-Ec_hrca_F | TGGGCTTCGACAGCTTAA<br>C | Anneals to 3' end of codon optimized LipPKS gene. Confirmation of integration into the host genome |
| cPCR-LipPKS-Ec_hrca_R | TCACGCTATCCAGCAGAC<br>T | Anneals to 5' end of codon optimized LipPKS gene. Confirmation of integration into the host genome |
| cPCR-LipPKS-WT_R      | CGCAGTCGTGCAGCTTA       | Anneals to 5' end of codon optimized LipPKS gene. Confirmation of integration into the host genome |
| cPCR-LipPKS-WT_F      | TCTTCGACCACCCGACA       | Anneals to 3' end of codon optimized LipPKS gene. Confirmation of integration into the host genome |
| cPCR-Sc_mmCoA_F       | GTCGGCAAGAGCACGTT       | Anneals to 3' end of S. cellulosum So ce56 mmCoA operon. Confirmation of                           |

|                                                                           |                                              |                                                                                                                  |
|---------------------------------------------------------------------------|----------------------------------------------|------------------------------------------------------------------------------------------------------------------|
|                                                                           |                                              | integration into the host genome                                                                                 |
| cPCR-Sc_mmCoA_R                                                           | ATCGTGAAGCGCAGCTC                            | Anneals to 5' end of <i>S. cellulorum</i> So ce56 mmCoA operon. Confirmation of integration into the host genome |
| <b>Confirmation primers for gene deletions and replacements in AG6212</b> |                                              |                                                                                                                  |
| cPCR-prpDBC2_F                                                            | GTGTTACCGATCCACTGG<br>GCGTCAACG              | Confirmation of <i>prpDBC2</i> deletion                                                                          |
| cPCR-prpDBC2_F                                                            | CATTGCGCATTCCGATCAT<br>GCGCGTCTGCG           | Confirmation of <i>prpDBC2</i> deletion                                                                          |
| cPCR-kivd-CCL4_F                                                          | GACATCATTCACCAGCAG<br>GTCGGTGGACTTCGTGC      | Confirmation of <i>kivd-CCL4</i> replacing Cgl0605                                                               |
| cPCR-kivd-CCL4_R                                                          | GCGGTGTGCGGGATGACT<br>TCGGAGTAGATG           | Confirmation of <i>kivd-CCL4</i> replacing Cgl0605                                                               |
| cPCR-sfp_F                                                                | GTCAATGTTGACGCGGCC<br>TGGACGGGTGGAACCGG<br>T | Confirmation of <i>sfp</i> replacing Cgl1016                                                                     |
| cPCR-sfp_F                                                                | ACCATCCGCCACATCGAG<br>TCTGTCCACCAGCT         | Confirmation of <i>sfp</i> replacing Cgl1016                                                                     |
| <b>Primers for RT-qPCR analysis</b>                                       |                                              |                                                                                                                  |
| qPCR-LipPKS-Cg_hrca_F                                                     | ATGTCCGAACACAGAGGA<br>AGT                    | Amplification of LipPKS cDNA for qPCR                                                                            |
| qPCR-LipPKS-Cg_mcu_F                                                      | CATATGTCCGAGCACAGG<br>G                      | Amplification of LipPKS cDNA for qPCR                                                                            |
| qPCR-LipPKS-Cg_ubc_F                                                      | ATGTCCGAACACAGGGGT<br>AG                     | Amplification of LipPKS cDNA for qPCR                                                                            |
| qPCR-LipPKS-Ec_hrca_F                                                     | ATGAGCGAACACAGAGGA<br>TCA                    | Amplification of LipPKS cDNA for qPCR                                                                            |
| qPCR-LipPKS-Ec_mcu_F                                                      | ATGAGCGAACATCGTGGT<br>AGT                    | Amplification of LipPKS cDNA for qPCR                                                                            |

|                       |                             |                                       |
|-----------------------|-----------------------------|---------------------------------------|
| qPCR-LipPKS-Ec_ubc_F  | ATGAGCGAACATCGTGGC          | Amplification of LipPKS cDNA for qPCR |
| qPCR-LipPKS-Pp_hrca_F | CATATGAGCGAGCACAGG<br>G     | Amplification of LipPKS cDNA for qPCR |
| qPCR-LipPKS-Pp_mcu_F  | CATATGTCGGAGCACAGG<br>G     | Amplification of LipPKS cDNA for qPCR |
| qPCR-LipPKS-Pp_ubc_F  | CATATGAGCGAGCACCGG          | Amplification of LipPKS cDNA for qPCR |
| qPCR-LipPKS-WT_GTG_F  | CATGTGTCCGAACACCGT<br>G     | Amplification of LipPKS cDNA for qPCR |
| qPCR-LipPKS-WT_ATG_F  | CATATGTCCGAACACCGTG<br>G    | Amplification of LipPKS cDNA for qPCR |
| qPCR-LipPKS-Cg_hrca_R | TCTAAGATGAGTCCTCAGA<br>GCCT | Amplification of LipPKS cDNA for qPCR |
| qPCR-LipPKS-Cg_mcu_R  | CTAAGATGCGTTCGCAGAG<br>GC   | Amplification of LipPKS cDNA for qPCR |
| qPCR-LipPKS-Cg_ubc_R  | GAGATGGGTTCGCAGAGC<br>TT    | Amplification of LipPKS cDNA for qPCR |
| qPCR-LipPKS-Ec_hrca_R | AGATGAGTTCTCAGAGCC<br>TCG   | Amplification of LipPKS cDNA for qPCR |
| qPCR-LipPKS-Ec_mcu_R  | GTTTCGCAGAGCCTCGCTA         | Amplification of LipPKS cDNA for qPCR |
| qPCR-LipPKS-Ec_ubc_R  | GTAAATGGGTTCGCAGAG<br>CTTC  | Amplification of LipPKS cDNA for qPCR |
| qPCR-LipPKS-Pp_hrca_R | GTTTCGCAGAGCCTCGGAT         | Amplification of LipPKS cDNA for qPCR |
| qPCR-LipPKS-Pp_mcu_R  | GTTTCGCAGAGCCTCGCTA         | Amplification of LipPKS cDNA for qPCR |
| qPCR-LipPKS-Pp_ubc_R  | GTTTCGCAGAGCCTCGCTA         | Amplification of LipPKS cDNA for qPCR |
| qPCR-LipPKS-WT_GTG_R  | AGATGCGTGCGCAGAG            | Amplification of LipPKS cDNA for qPCR |

|                                                            |                                                               |                                                                          |
|------------------------------------------------------------|---------------------------------------------------------------|--------------------------------------------------------------------------|
| qPCR-LipPKS-WT_ATG_R                                       | AGATGCGTGCGCAGAG                                              | Amplification of LipPKS cDNA for qPCR                                    |
| qPCR-Pp-RpoD_F                                             | CAGGGCTACCTGACTTACGC                                          | <i>P. putida</i> housekeeping gene used as internal control for qPCR     |
| qPCR-Pp-RpoD_R                                             | ACGTTGATCCCCATGTCGTT                                          | <i>P. putida</i> housekeeping gene used as internal control for qPCR     |
| qPCR-Ec-RpoD_F                                             | GGAGCAAACCCGCAGTC                                             | <i>E. coli</i> housekeeping gene used as internal control for qPCR       |
| qPCR-Ec-RpoD_R                                             | CGACGATATCTTCCGGCAG                                           | <i>E. coli</i> housekeeping gene used as internal control for qPCR       |
| qPCR-Cg-RpoC_F                                             | GTGCTCGACGTAAACGTC TTC                                        | <i>C. glutamicum</i> housekeeping gene used as internal control for qPCR |
| qPCR-Cg-RpoC_R                                             | GAGGGTTCGGTAGTTGAT GGT                                        | <i>C. glutamicum</i> housekeeping gene used as internal control for qPCR |
| <b>Gibson primers for assembly of pAN001 LipPKS-WT_GTG</b> |                                                               |                                                                          |
| gPCR-WT-LipM1-Frag1_F                                      | CGAATTCAAAGATCTTT TAAGAAGGAGATATACAT GTGTCCGAACACCGTGG CAGTGC | Amplification of WT sequence of LipM1 fragment 1                         |
| gPCR-WT-LipM1-Frag1_R                                      | CCTCGTCGCGAGGGCG AACGCCACGTCCGGCG                             | Amplification of WT sequence of LipM1 fragment 1                         |
| gPCR-WT-LipM1-Frag2_F                                      | ACGTGGCGTTCGCCCTC GCGACGAGGCGTACTGC                           | Amplification of WT sequence of LipM1 fragment 2                         |
| gPCR-WT-LipM1-Frag2_R                                      | TCCCGCTGTCCAGCTCG GCCTTGAGGTACGCG                             | Amplification of WT sequence of LipM1 fragment 2                         |



|                                                                |                                                                                |                                                                                         |
|----------------------------------------------------------------|--------------------------------------------------------------------------------|-----------------------------------------------------------------------------------------|
| gPCR-WT-EryM6-TE_F                                             | CCTCAAGGCCGAGCTGG<br>ACAGCGGGACTCCCCG<br>CC                                    | Amplification of WT<br>sequence of EryM6-TE                                             |
| gPCR-WT-EryM6-TE_R                                             | GTTTTATTTGATGCCTGG<br>AGATCCTTACTCGATCAG<br>TGGTGGTGGTGGTGGTG<br>C             | Amplification of WT<br>sequence of EryM6-TE                                             |
| <b>Gibson primers for assembly of pAN001 LipPKS-WT_ATG</b>     |                                                                                |                                                                                         |
| gPCR-WT-LipM1-ATG-Fra<br>g1_F                                  | CGAATTCAAAGATCTTT<br>TAAGAAGGAGATATACAT<br><b>A</b> TGTCCGAACACCGTGG<br>CAGTGC | Amplification of WT<br>sequence of LipM1<br>fragment 1 with ATG<br>start codon mutation |
| <b>Gibson primers for assembly of pBH026 RFP</b>               |                                                                                |                                                                                         |
| gPCR-pBH026_F                                                  | GAAGGTCGTCACTCCACC<br>GGTGCTTAAGGATCCAAA<br>CTCGAGTAAGGATCTCCA<br>GG           | Amplification of pBH026<br>plasmid backbone                                             |
| gPCR-pBH026_R                                                  | ACGTCTTCGCTACTCGCC<br>ATATGTATATCTCCTTCTTA<br>AAAGATCTTTTGAATTG                | Amplification of pBH026<br>plasmid backbone                                             |
| gPCR-RFP_F                                                     | AGAAGGAGATATACATATG<br>GCGAGTAGCGAAGACG                                        | Amplification of <i>rfp</i> gene                                                        |
| gPCR-RFP_R                                                     | TTAAGCACCGGTGGAGTG<br>ACGACCT                                                  | Amplification of <i>rfp</i> gene                                                        |
| <b>Gibson primers for assembly of pK18 ΔCgl0605::kivd-CCL4</b> |                                                                                |                                                                                         |
| gPCR-pK18-Cgl0605_F                                            | TCGGGTGGGCCTTTCTGC<br>GTTTATAGCCCTTGATTATT<br>GCCAAAGAAACCTTTAAG<br>GACT       | Amplification of pK18<br>ΔCgl0605<br>plasmid<br>backbone                                |
| gPCR-pK18-Cgl0605_R                                            | CGAGCCGCAGCCGAATGT<br>GACTAGTTAACGTGCAGG<br>CTTACCTTTTGAAGC                    | Amplification of pK18<br>ΔCgl0605<br>plasmid<br>backbone                                |
| gPCR-kivd-CCL4_F                                               | GCTTCCAAAAGGTAAGCC<br>TGCACGTTAACTAGTCACA<br>TTCGGCTGCGGCTCG                   | Amplification of <i>kivd</i> and<br><i>CCL4</i><br>expression<br>cassette               |

|                                                                    |                                                                         |                                                                                                                |
|--------------------------------------------------------------------|-------------------------------------------------------------------------|----------------------------------------------------------------------------------------------------------------|
| gPCR-kivd-CCL4_R                                                   | AGTCCTTAAAGGTTTCTTT<br>GGCAATAATCAAGGGCTAT<br>AAACGCAGAAAGGCCAC<br>CCGA | Amplification of <i>kivd</i> and<br><i>CCL4</i> expression<br>cassette                                         |
| <b>Gibson primers for assembly of pJH209 Sc_mmCoA</b>              |                                                                         |                                                                                                                |
| gPCR-pJH209_F                                                      | GGCCAGGAACCGTAAAAA<br>AGTCAAAGCCTCCGGTC<br>GGAGG                        | Amplification of pJH209<br>plasmid backbone                                                                    |
| gPCR-pJH209_R                                                      | CGACTTCGTGACAACGAT<br>CCCCCAACTGAGAGAACT<br>CAAAGG                      | Amplification of pJH209<br>plasmid backbone                                                                    |
| gPCR-Ptac-Sc_mmCoA_F                                               | AGTTCTCTCAGTTGGGGG<br>ATCGTTGTCACGAAGTCG<br>ACTACG                      | Amplification of <i>S.</i><br><i>cellulosum</i> So56<br>mmCoA operon under<br>the control of P <sub>ta</sub> c |
| gPCR-Ptac-Sc_mmCoA_F                                               | GACCGGAGGCTTTTGACT<br>TTTTTACGGTTCCTGGCCT<br>TTTGC                      | Amplification of <i>S.</i><br><i>cellulosum</i> So56<br>mmCoA operon under<br>the control of P <sub>ta</sub> c |
| <b>Gibson primers for assembly of pGingerBG-NahR LipPKS-Pp_mcu</b> |                                                                         |                                                                                                                |
| gPCR-pGingerBG-NahR_<br>F                                          | GCGGCAATAGCTGAGGA<br>TCCAAACTCGAGTAAGG<br>ATCTCC                        | Amplification of<br>pGingerBG-NahR<br>plasmid backbone                                                         |
| gPCR-pGingerBG-NahR_<br>R                                          | ACCCCTGTGCTCCGACA<br>TATGTATATCTCCTTCTTA<br>AATGATGGCTTTATTG            | Amplification of<br>pGingerBG-NahR<br>plasmid backbone                                                         |
| gPCR-LipPKS-Pp_mcu-Fr<br>ag1_F                                     | GAAGGAGATATACATATG<br>TCGGAGCACAGGGGTAG<br>TG                           | Amplification of<br>LipPKS-Pp_mcu<br>fragment 1                                                                |
| gPCR-LipPKS-Pp_mcu-Fr<br>ag1_R                                     | CGCAAGCCTGCCATAGT<br>GCGGCCAGACTCACC                                    | Amplification of<br>LipPKS-Pp_mcu<br>fragment 1                                                                |
| gPCR-LipPKS-Pp_mcu-Fr<br>ag2_F                                     | TCTGGCCGCACTATGGC<br>AGGCTTGCGGGGTG                                     | Amplification of<br>LipPKS-Pp_mcu<br>fragment 2                                                                |

|                                                                    |                                                              |                                                     |    |
|--------------------------------------------------------------------|--------------------------------------------------------------|-----------------------------------------------------|----|
| gPCR-LipPKS-Pp_mcu-Fr<br>ag2_R                                     | CGAGTTTGGATCCTCAG<br>CTATTGCCGCGCCAG                         | Amplification<br>LipPKS-Pp_mcu<br>fragment 2        | of |
| <b>Gibson primers for assembly of pGingerBG-NahR LipPKS-Ec_mcu</b> |                                                              |                                                     |    |
| gPCR-pGingerBG-NahR_<br>F                                          | GGCGGAGGGAATAGTTA<br>AGGATCCAAACTCGAGT<br>AAGGATCTCC         | Amplification<br>pGingerBG-NahR<br>plasmid backbone | of |
| gPCR-pGingerBG-NahR_<br>R                                          | CCACGATGTTTCGCTCATA<br>TGTATATCTCCTTCTTAAA<br>TGATGGCTTTATTG | Amplification<br>pGingerBG-NahR<br>plasmid backbone | of |
| gPCR-LipPKS-Ec_mcu-Fr<br>ag1_F                                     | GAAGGAGATATACATATG<br>AGCGAACATCGTGGTAG<br>TGCAGGT           | Amplification<br>LipPKS-Ec_mcu<br>fragment 1        | of |
| gPCR-LipPKS-Ec_mcu-Fr<br>ag1_R                                     | GTTCTTCATCACCGCTAC<br>GTAGAACCTCCAGCAGG<br>TTCCAATCCA        | Amplification<br>LipPKS-Ec_mcu<br>fragment 1        | of |
| gPCR-LipPKS-Ec_mcu-Fr<br>ag2_F                                     | GGAGGTTCTACGTAGCG<br>GTGATGAAGAACTGAGT<br>AATCGCG            | Amplification<br>LipPKS-Ec_mcu<br>fragment 2        | of |
| gPCR-LipPKS-Ec_mcu-Fr<br>ag2_R                                     | CGAGTTTGGATCCTTAAC<br>TATCCCTCCGCCAGC<br>C                   | Amplification<br>LipPKS-Ec_mcu<br>fragment 2        | of |

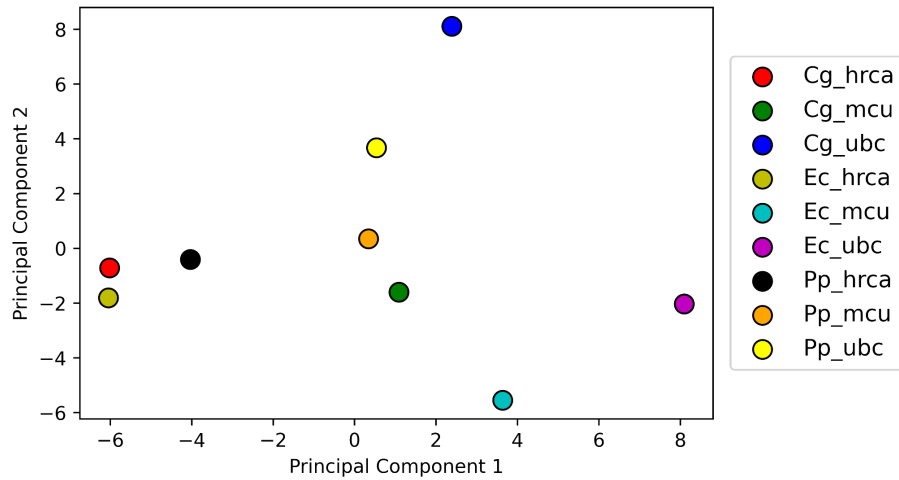

**Figure S1:** Principal component analysis of optimized LipPKS sequences. A high similarity in codon usage leads to clustering of the respective nucleotide sequences. The hrca optimized genes are in close proximity to each other.

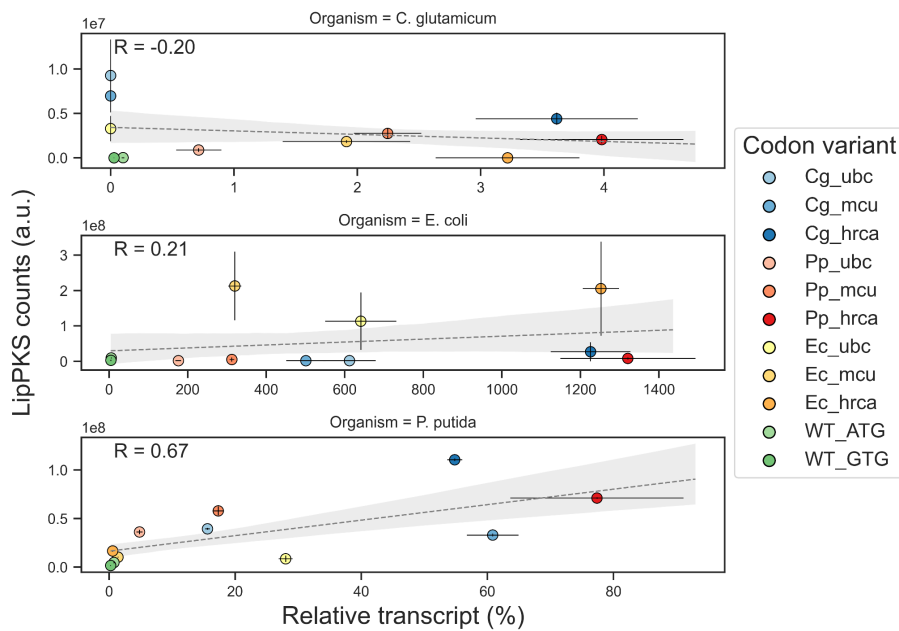

**Figure S2:** Regression plot of LipPKS counts and relative transcript for *C. glutamicum*, *E. coli*, and *P. putida* ( $n = 3$ ). Only *P. putida* showed a slight correlation between these two parameters.

(a)

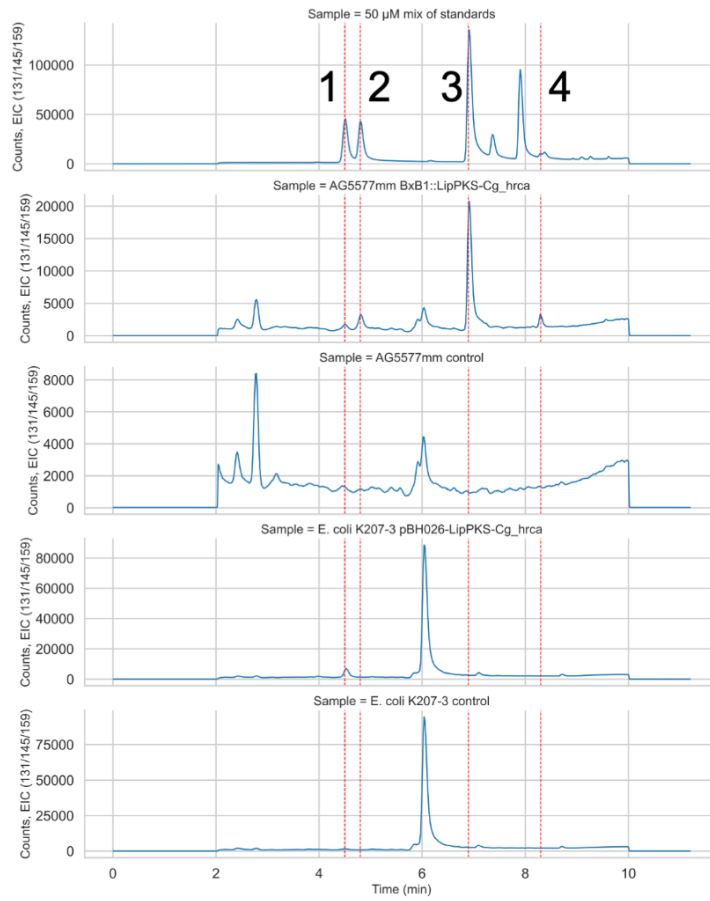

(b)

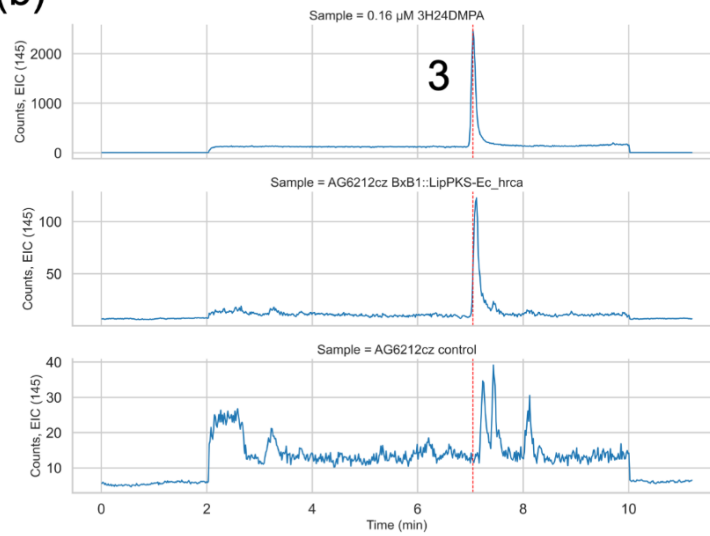

**Figure S3:** LC-MS chromatograms showing the production of unnatural polyketides in *C. glutamicum* (a), *E. coli* and *P. putida* (b). Red lines indicate the retention time of the authentic standard. Additional peaks for the authentic standards are most likely caused by racemic mixtures of the 3-hydroxy acids. Standards for (2S,3S)-3-hydroxy-2,4-dimethylpentanoic acid (3H24DMPA) and (2S,3S)-3-hydroxy-2-methylpentanoic acid (3H2MPA) are enantiopure. Standards for 3-hydroxy-4-methylpentanoic acid (3H4MPA) and 3-hydroxy-2,4-dimethylhexanoic acid (3H24DMHA) are racemic mixtures. 1 = 3H2MPA; 2 = 3H4MPA; 3 = 3H24DMPA; 4 = 3H24DMHA

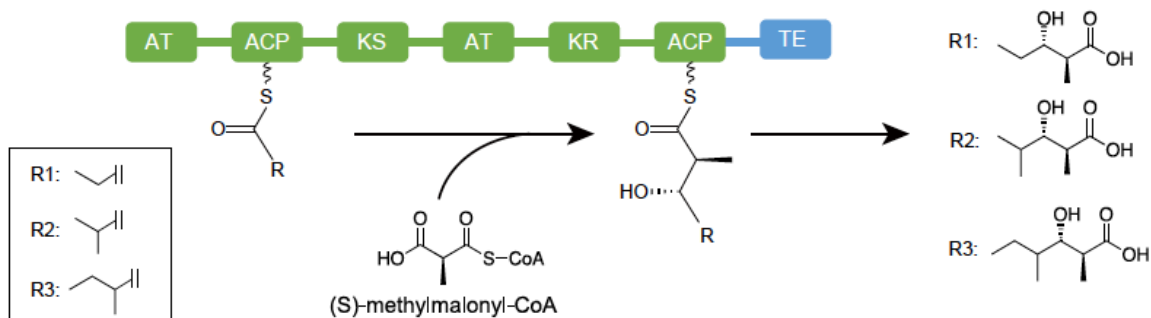

**Figure S4:** Polyketide synthesis mechanism with various loading substrates and possible products. The final polyketide depends on the availability of the starter unit propionyl-CoA (R1), isobutyryl-CoA (R2) or 2-methylbutyryl-CoA (R3). In the engineered strains *C. glutamicum* AG6212cz and *P. putida* AG5577mm, the most likely product is (2S,3S)-3-hydroxy-2,4-dimethylpentanoic acid (R2). In *E. coli* K207-3, the only possible product is (2S,3S)-3-hydroxy-2-methylpentanoic acid (R1).

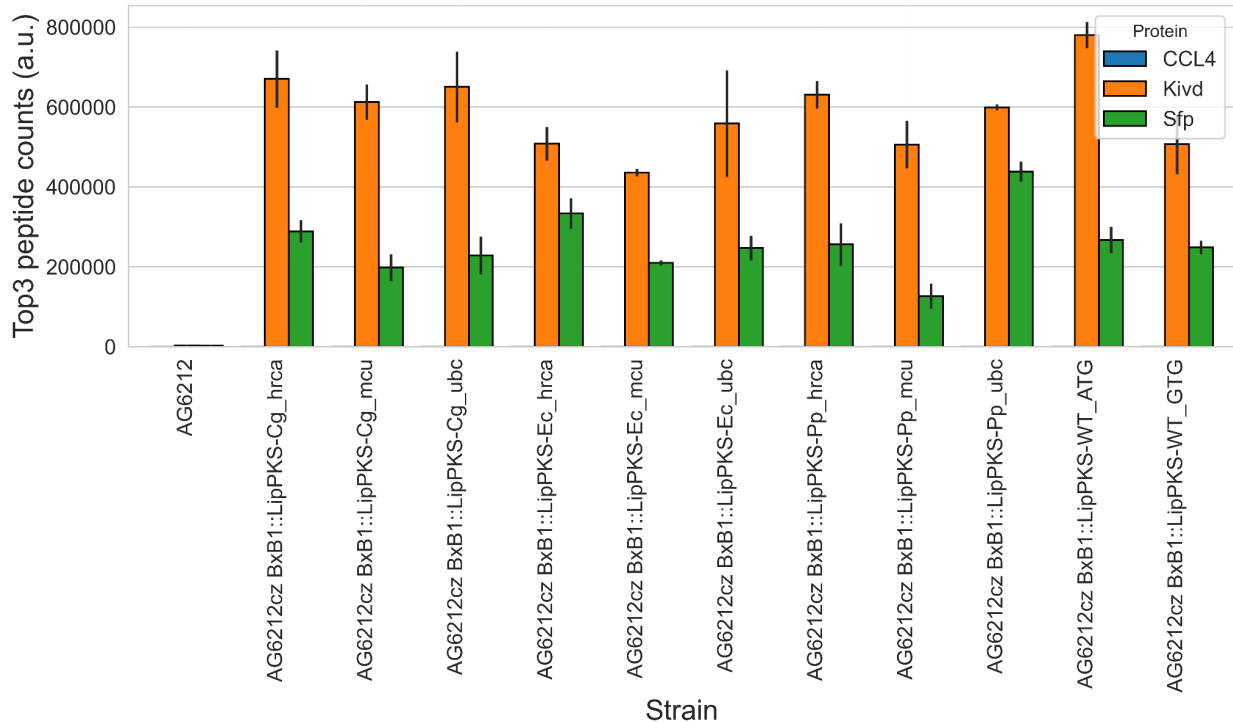

**Figure S5:** Detection of peptides for supplementary pathways in the *C. glutamicum* ATCC 13032 derivative AG6212cz (n = 3). The corresponding peptides for the phosphopantetheinyl transferase (PPTase) Sfp and ketoisovalerate decarboxylase, Kivd, were detected in all AG6212cz strains. CCL4 peptides could not be detected.

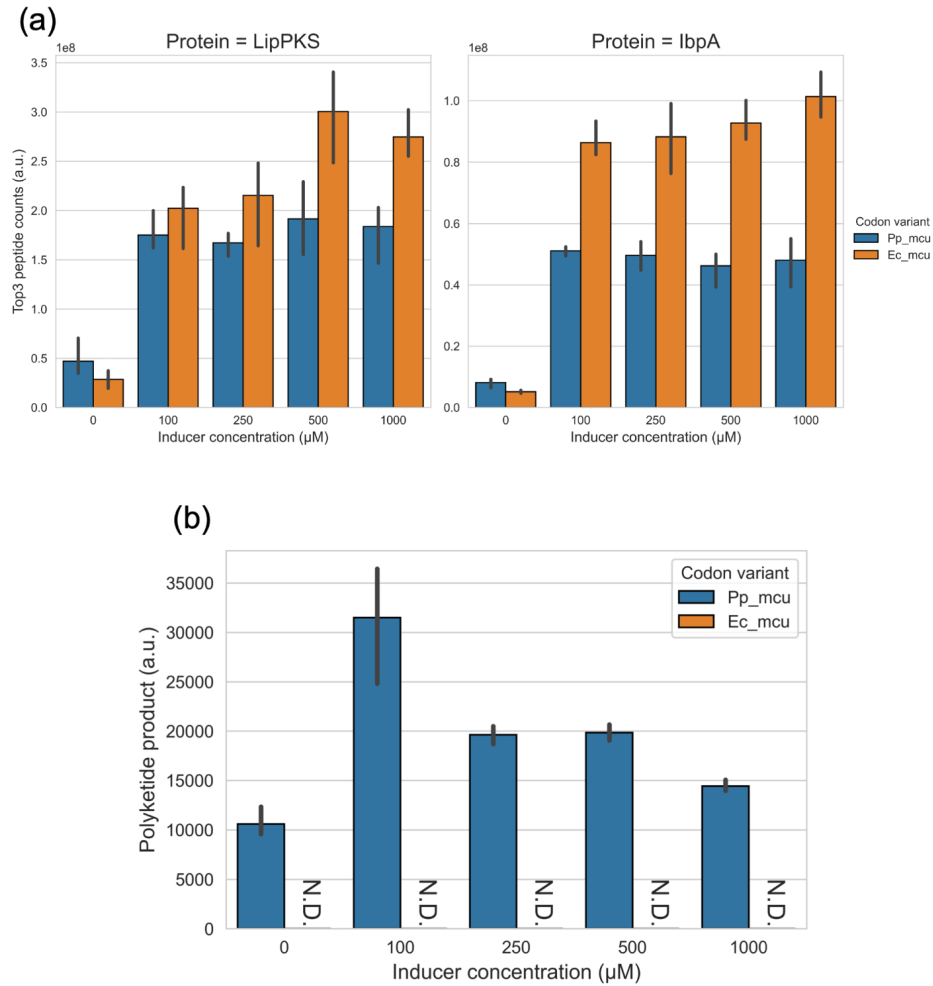

**Figure S6:** Expression of the LipPKS codon variants Pp\_mcu and Ec\_mcu from the inducible vector system pGingerBG-NahR in *P. putida* (n = 3). The inducer salicylate was added at the time of inoculation. (a) LipPKS protein levels were comparable, while lbpA levels were significantly higher for Ec\_mcu. (b) LC-MS analysis of the same samples (n = 3) revealed no production of the corresponding polyketide for the Ec\_mcu variant.
